# Supplementary material for: Does Evidence Exist to Blunt Inflammatory Response by Nutraceutical Supplementation during COVID-19 Pandemic? An Overview of Systematic Reviews of Vitamin D, Vitamin C, Melatonin, and Zinc
Source: MDPI journal article supplement (doi:10.3390/nu13041261), 2021-04-12
Supplement: s1 [file s1]

### Assessment of each systematic review by the AMSTAR tool

| <b>AMSTAR Vitamin D</b>                                                                | <b><i>Omid Asbaghia (2019)</i></b> | <b><i>Sheila A. FisherID (2019)</i></b> | <b><i>Mingming Wanga (2019)</i></b> | <b><i>Yanting Yu (2017)</i></b> | <b><i>Mohsen Mazidi (2018)</i></b> | <b><i>EK Calton (2018)</i></b> | <b><i>Tari Agbalalah (2017)</i></b> | <b><i>Małgorzata Jamka (2015)</i></b> | <b><i>Neng Chen (2014)</i></b> |
|----------------------------------------------------------------------------------------|------------------------------------|-----------------------------------------|-------------------------------------|---------------------------------|------------------------------------|--------------------------------|-------------------------------------|---------------------------------------|--------------------------------|
| <i>1.A-priori design</i>                                                               | Yes                                | Yes                                     | Yes                                 | No                              | Yes                                | Yes                            | ND                                  | Yes                                   | ND                             |
| <i>2.Duplicate study selection and data extraction</i>                                 | Yes                                | Yes                                     | Yes                                 | Yes                             | Yes                                | Yes                            | Yes                                 | Yes                                   | Yes                            |
| <i>3.Comprehensive literature review</i>                                               | Yes                                | Yes                                     | Yes                                 | Yes                             | ND                                 | Yes                            | Yes                                 | Yes                                   | Yes                            |
| <i>4.Unpublished grey reports Sought*</i>                                              | No                                 | No                                      | No                                  | Yes                             | ND                                 | ND                             | ND                                  | Yes                                   | Yes                            |
| <i>5.List of included and excluded studies provided</i>                                | No                                 | No                                      | No                                  | No                              | NO                                 | No                             | NO                                  | No                                    | No                             |
| <i>6.Characteristics of individual studies provided</i>                                | Yes                                | Yes                                     | Yes                                 | Yes                             | Yes                                | Yes                            | Yes                                 | Yes                                   | Yes                            |
| <i>7.Scientific quality of studies assessed and documented*</i>                        | No                                 | No                                      | No                                  | Yes                             | ND                                 | No                             | No                                  | No                                    | Yes                            |
| <i>8.Scientific quality of studies used for conclusions</i>                            | No                                 | ND                                      | No                                  | Yes                             | ND                                 | No                             | No                                  | ND                                    | Yes                            |
| <i>9.Statistical method appropriate</i>                                                | Yes                                | Yes                                     | Yes                                 | Yes                             | Yes                                | Yes                            | Yes                                 | Yes                                   | Yes                            |
| <i>10.Likelihood of publication bias assessed</i>                                      | Yes                                | Yes                                     | Yes                                 | Yes                             | Yes                                | Yes                            | Yes                                 | Yes                                   | Yes                            |
| <i>11.Conflict of interest declared in both systematic review and included studies</i> | Yes                                | Yes                                     | Yes                                 | Yes                             | Yes                                | Yes                            | Yes                                 | Yes                                   | Yes                            |
| <i>Aggregate score</i>                                                                 | 7/11                               | 7/11                                    | 7/11                                | 9/11                            | 5/11                               | 7/11                           | 6/11                                | 8/11                                  | 8/11                           |

| <b>AMSTAR Vitamin C</b>                                                         | <i>Maryam Safa bakhsh (2019)</i> | <i>Sadegh Jafarnejad (2018)</i> | <i>Ammar W. Ashor (2015)</i> | <i>Ammar W. Ashor (2014)</i> |
|---------------------------------------------------------------------------------|----------------------------------|---------------------------------|------------------------------|------------------------------|
| 1.A-priori design                                                               | Yes                              | Yes                             | ND                           | ND                           |
| 2.Duplicate study selection and data extraction                                 | Yes                              | Yes                             | Yes                          | Yes                          |
| 3.Comprehensive literature review                                               | Yes                              | Yes                             | Yes                          | Yes                          |
| 4.Unpublished grey reports Sought*                                              | No                               | Yes                             | No                           | No                           |
| 5.List of included and excluded studies provided                                | No                               | No                              | No                           | No                           |
| 6.Characteristics of individual studies provided                                | Yes                              | Yes                             | Yes                          | Yes                          |
| 7.Scientific quality of studies assessed and documented*                        | Yes                              | Yes                             | Yes                          | Yes                          |
| 8.Scientific quality of studies used for conclusions                            | Yes                              | Yes                             | Yes                          | No                           |
| 9.Statistical method appropriate                                                | Yes                              | Yes                             | Yes                          | Yes                          |
| 10.Likelihood of publication bias assessed                                      | Yes                              | Yes                             | Yes                          | Yes                          |
| 11.Conflict of interest declared in both systematic review and included studies | Yes                              | Yes                             | Yes                          | Yes                          |
| Aggregate score                                                                 | 9/11                             | 10/11                           | 8/11                         | 7/11                         |

| <b>AMSTAR melatonin</b>                                                                | <i>Zarezadeh M (2019)</i> | <i>Akbari M (2018)</i> |
|----------------------------------------------------------------------------------------|---------------------------|------------------------|
| <i>1.A-priori design</i>                                                               | Yes                       | Yes                    |
| <i>2.Duplicate study selection and data extraction</i>                                 | Yes                       | Yes                    |
| <i>3.Comprehensive literature review</i>                                               | Yes                       | Yes                    |
| <i>4.Unpublished grey reports sought</i>                                               | No                        | No                     |
| <i>5.List of included and excluded studies provided</i>                                | No                        | No                     |
| <i>6.Characteristics of individual studies provided</i>                                | Yes                       | Yes                    |
| <i>7.Scientific quality of studies assessed and documented*</i>                        | No                        | Yes                    |
| <i>8.Scientific quality of studies used for conclusions</i>                            | Yes                       | Yes                    |
| <i>9.Statistical method appropriate</i>                                                | Yes                       | Yes                    |
| <i>10.Likelihood of publication bias assessed</i>                                      | Yes                       | Yes                    |
| <i>11.Conflict of interest declared in both systematic review and included studies</i> | Yes                       | Yes                    |
| <i>Aggregate score</i>                                                                 | 8/11                      | 9/11                   |

| <b>AMSTAR zinc</b>                                                                     | <b><i>Mousavi SM (2018)</i></b> |
|----------------------------------------------------------------------------------------|---------------------------------|
| <i>1.A-priori design</i>                                                               | ND                              |
| <i>2.Duplicate study selection and data extraction</i>                                 | Yes                             |
| <i>3.Comprehensive literature review</i>                                               | Yes                             |
| <i>4.Unpublished grey reports sought</i>                                               | No                              |
| <i>5.List of included and excluded studies provided</i>                                | No                              |
| <i>6.Characteristics of individual studies provided</i>                                | Yes                             |
| <i>7.Scientific quality of studies assessed and documented*</i>                        | No                              |
| <i>8.Scientific quality of studies used for conclusions</i>                            | Yes                             |
| <i>9.Statistical method appropriate</i>                                                | Yes                             |
| <i>10.Likelihood of publication bias assessed</i>                                      |                                 |
| <i>11.Conflict of interest declared in both systematic review and included studies</i> | Yes                             |
| <i>Aggregate score</i>                                                                 | 6/11                            |
